# Supplementary material
Source: PubMed Central journal article supplement (PMC3180806)
Supplement: supp_tpc.111.085829_Chen_Supplemental_Data_final.pdf [file supp_tpc.111.085829_Chen_Supplemental_Data_final.pdf]

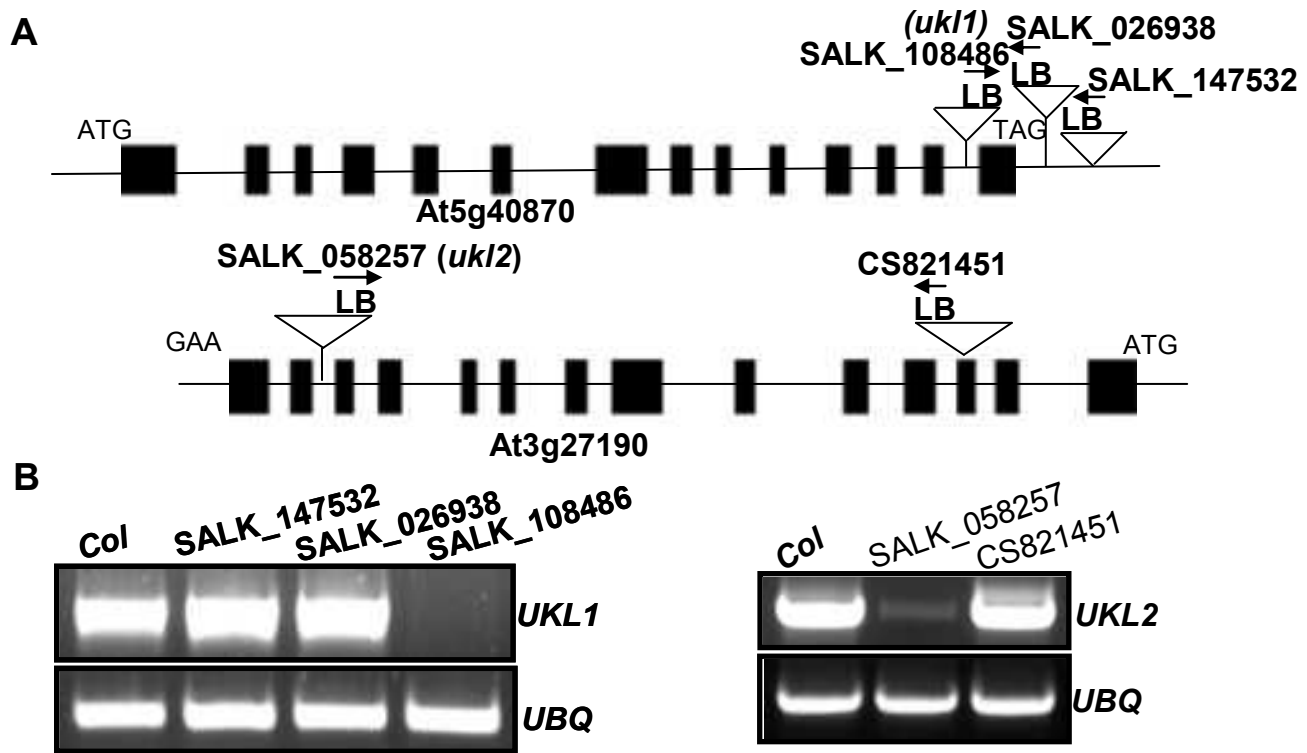

Supplemental Figure 1. *ukl1* and *ukl2* mutant identification. **A**, Schematic representation of T-DNA insertion positions in *At5g40870* and *At3g27190*. LB, T-DNA left border. **B**, *UKL1* gene expression was knocked out in *SALK\_108486* and *UKL2* expression was highly reduced in *SALK\_058257* T-DNA insertion lines. RT-PCR was used to detect gene expression and *UBQ* was used as the loading control.

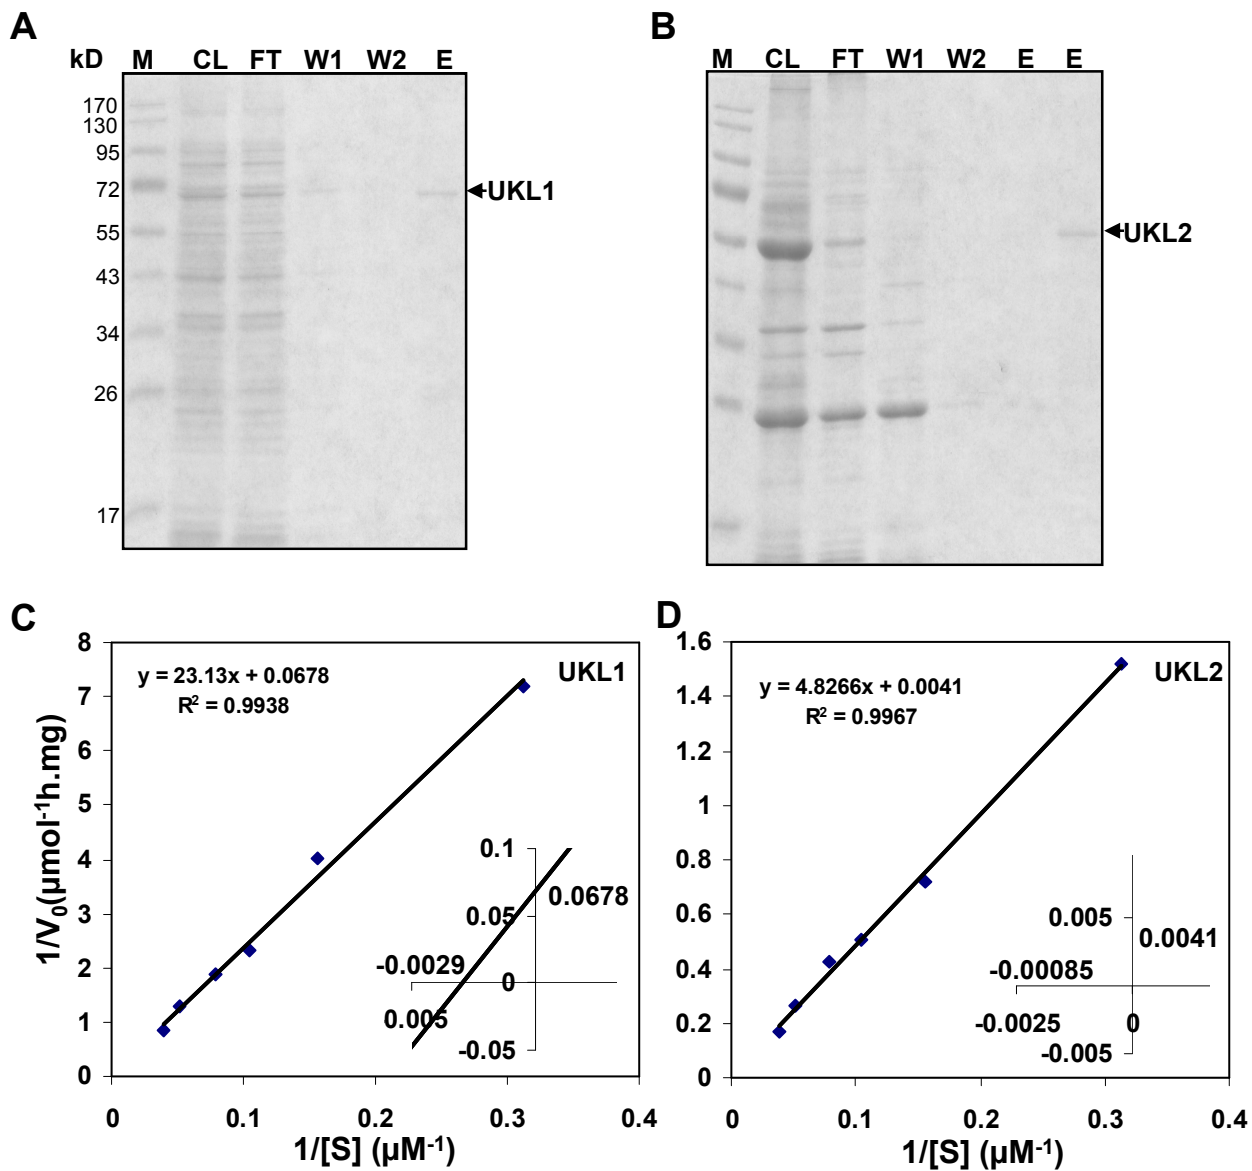

**Supplemental Figure 2. Recombinant UKL1 and UKL2 protein kinetic assay.** *A, B*, SDS-PAGE Coomassie staining results of Ni-NTA purification of His-tagged recombinant UKL proteins. M, marker bands showing protein size in kilodaltons; CL, crude lysate; FT, flow through; W1 and W2, wash steps 1 and 2; E, eluate. Recombinant proteins are marked with arrows. *C, D*, Lineweaver-Burk plot of UKL1 and UKL2.

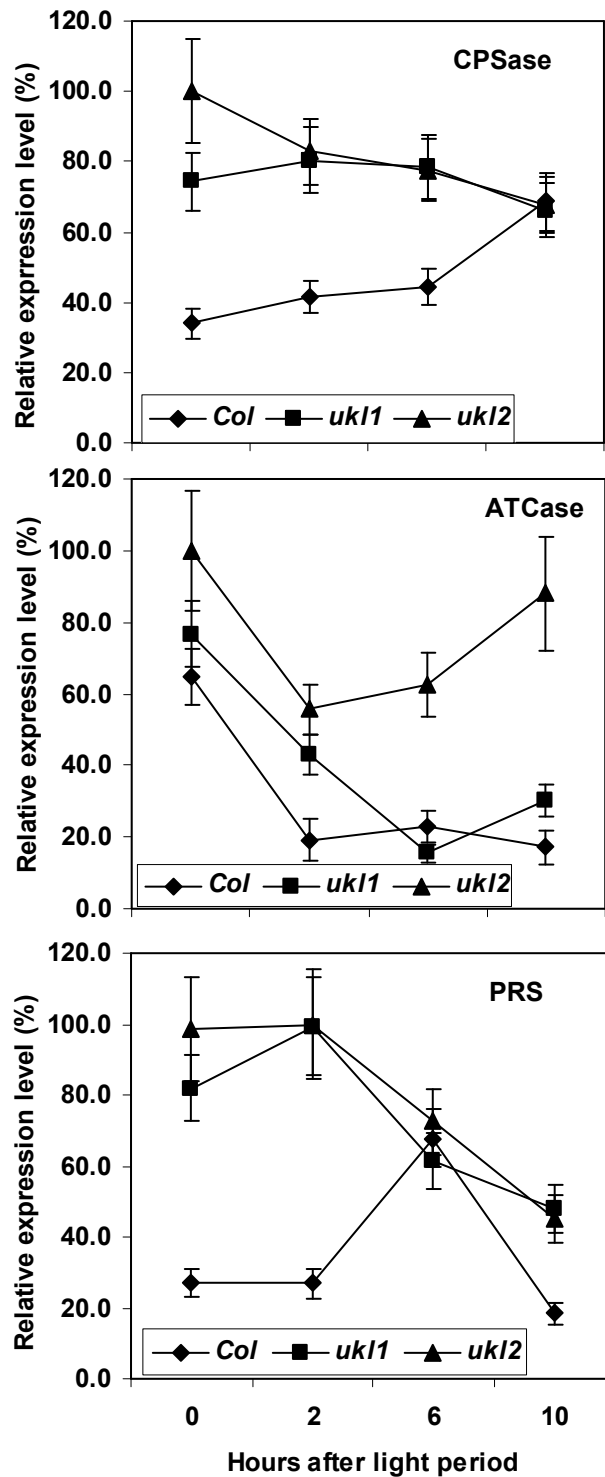

**Supplemental Figure 3. Transcriptional Expression of Genes in the *de novo* Pyrimidine Biosynthesis Pathway is Altered in the *uk11* and *uk12* Mutant.**

The signal was normalized to *UBQ* internal standard from three biological replicates, the highest signal is set as 1. CPSase, carbamoylphosphate synthase; ATCase, aspartate transcarbamoylase; PRS, PRPP synthetase.

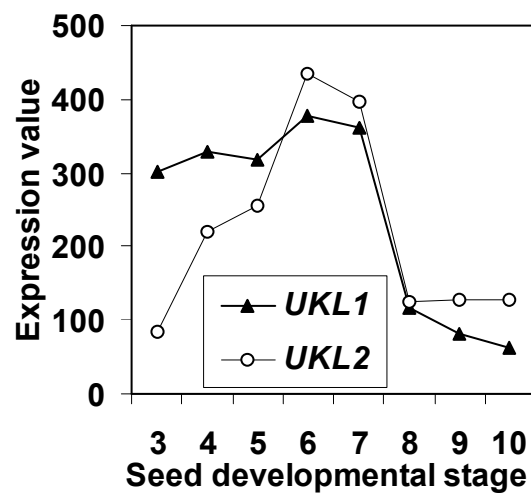

**Supplemental Figure 4. *UKL1* and *UKL2* are Differentially Expressed during Seed Development.** The microarray expression data of *UKL1* and *UKL2* across different seed developmental stages from the public domain is used.

**Supplemental Table 1. Primers used in this study**

| <b>Primer</b> | <b>Sequence (5' to 3')</b>   | <b>Target</b> |
|---------------|------------------------------|---------------|
| 1             | ATGCAAGTGCCTCTACTGTCG        | UKL1          |
| 2             | TTACGCGCTTGCTGCAAAGGA        | UKL1          |
| 3             | GAAGGATCCATGCCGGAAGATTCTTCT  | UKL1          |
| 4             | GGGCGGCCGCCTGGTCTTCCTCGTCGGT | UKL1          |
| 5             | CACCATGCCGGAAGATTCTTCT       | UKL1          |
| 6             | CTACTGGTCTTCCTCGTCGGT        | UKL1          |
| 7             | ATGTGGGCTTCAGGTACTCCT        | UKL2          |
| 8             | ACACTGAGCAGCTTTTGCATT        | UKL2          |
| 9             | GAAGGATCCATGCCAGAAGATTCAACG  | UKL2          |
| 10            | GGGCGGCCGCCTCGTCGGTACCAAAGTA | UKL2          |
| 11            | CACCATGCCAGAAGATTCAACG       | UKL2          |
| 12            | CTACTCGTCGGTACCAAAGTA        | UKL2          |
| 13            | ACGCTGAATGGGATTTCAAC         | At3g27740     |
| 14            | TGAGCACTGATCTCCACCTG         | At3a27740     |
| 15            | CCATTGCTAACGACCCAGAT         | At1g29900     |
| 16            | CAAAGCGATTTGCTTGCTCA         | At1g29900     |
| 17            | ACTCCCTTCTCCTGCTCTCC         | At1g75330     |
| 18            | AACACGAGCAACATCACGAG         | At1g75330     |
| 19            | ATTGAAGGGTATGCCTCGTG         | At3g54470     |
| 20            | GGGTTTTCCGCCTTTATGAT         | At3g54470     |
| 21            | TGGTCCAGGAAGTGAAAAG          | At5g26667     |
| 22            | CCTCATTACGAGGGAAACCA         | At5g26667     |
| 23            | TCCGTCTTTTCTCTCGCAAT         | At5g63310     |
| 24            | TTCCAAGCCATACACACAA          | At5g63310     |
| 25            | CATCAAGTGCGGAGTCAGAA         | At1g10700     |
| 26            | CGAAGATCACAGCAGGTGAA         | At1g10700     |
| 27            | AGGTTGCGATGTCTTTTTGG         | At1g32380     |
| 28            | CCTGGCTACTCCACCAACAT         | At1g32380     |
| 29            | GGACCTTGGGAAAATCAAG          | At2g44530     |
| 30            | CGGAGTGAAGATCACAAGCA         | At2g44530     |
